# Supplementary material for: Cross-Reaction, Enhancement, and Neutralization Activity of Dengue Virus Antibodies against Zika Virus: A Study in the Mexican Population
Source: Hindawi journal article supplement (doi:10.1155/2019/7239347), 2019-09-02
Supplement: f1 [file 7239347.f1.pdf]

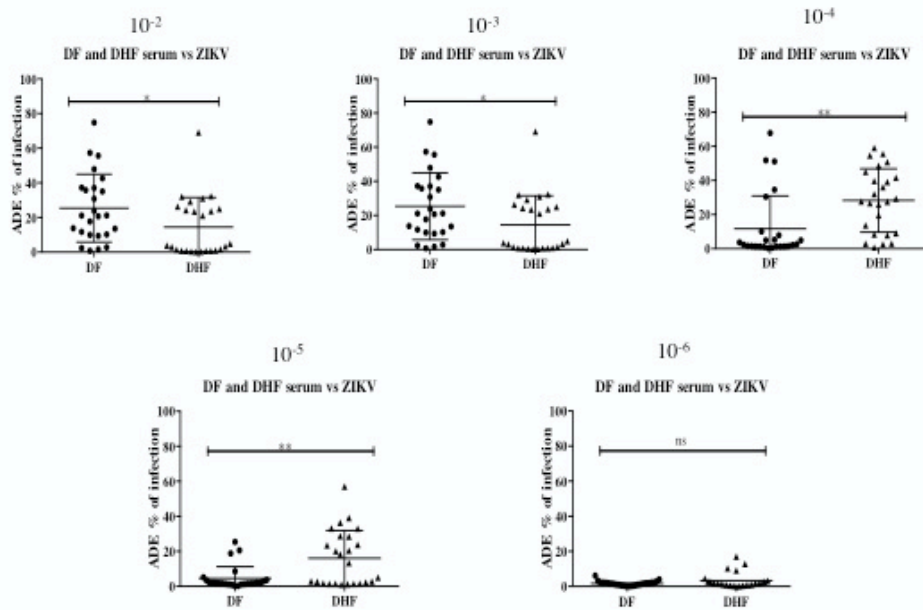

**Supplementary Fig 1. Antibody-dependent enhancement of ZIKV by DF and DHF sera.** Comparison of both groups DF and DHF. Serially diluted sera ( $10^{-2}$ - $10^{-6}$ ) were mixed and incubated for 1 h with  $1.25 \times 10^5$  PFU of ZIKV and used to infect  $5 \times 10^4$  K562 cells for 24 h. Infection was analyzed by flow cytometry. As a positive control, 4G2 serum was used for ADE. Bars represent the mean  $\pm$  SD. \* $P < 0.05$ , \*\* $P < 0.01$ , \*\*\* $P < 0.001$ .

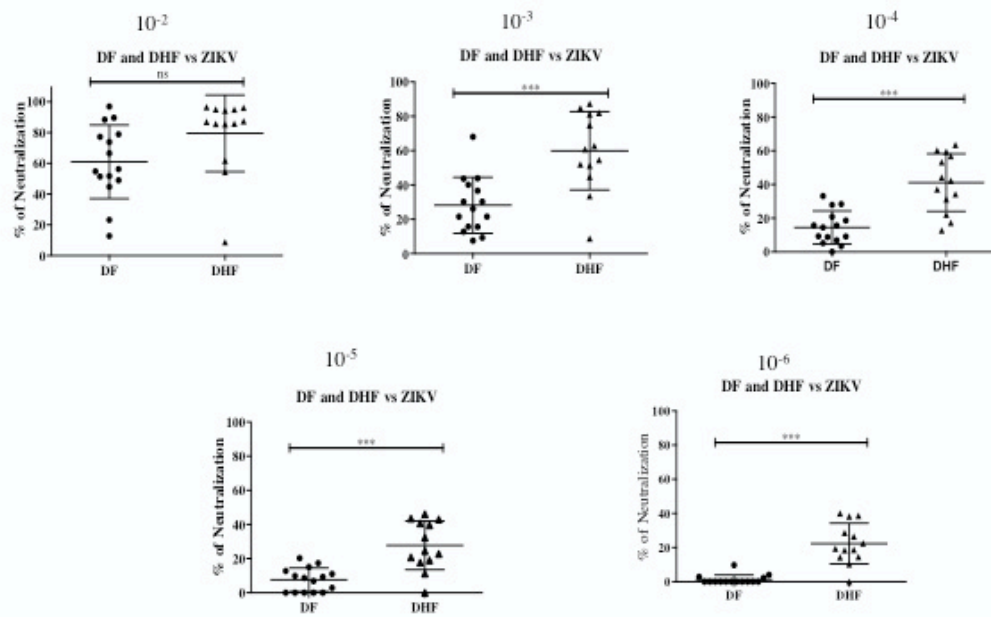

**Supplementary Fig 2. Neutralization of ZIKV by DENV sera at different dilutions of DF and DHF sera.** Serially diluted sera from (10<sup>-2</sup>-10<sup>-6</sup>). DF and DHF patients were mixed with 7.5 × 10<sup>5</sup> PFU of ZIKV and incubated for 1 h; these mixture were used to infect 2.5 × 10<sup>5</sup> Vero cells for 24 h, and infection was evaluated by flow cytometry. Bars represent the mean ± SD. \*P < 0.05, \*\*P < 0.01, \*\*\*P < 0.001.
